# Supplementary material
Source: PubMed Central journal article supplement (PMC8865486)
Supplement: 41580_2022_467_MOESM1_ESM.pdf [file 41580_2022_467_MOESM1_ESM.pdf]

## Supplementary information

---

# Let's talk about (biological) sex

---

In the format provided by the  
authors and unedited

**Supplementary Figure 1. Parsing sex differences**

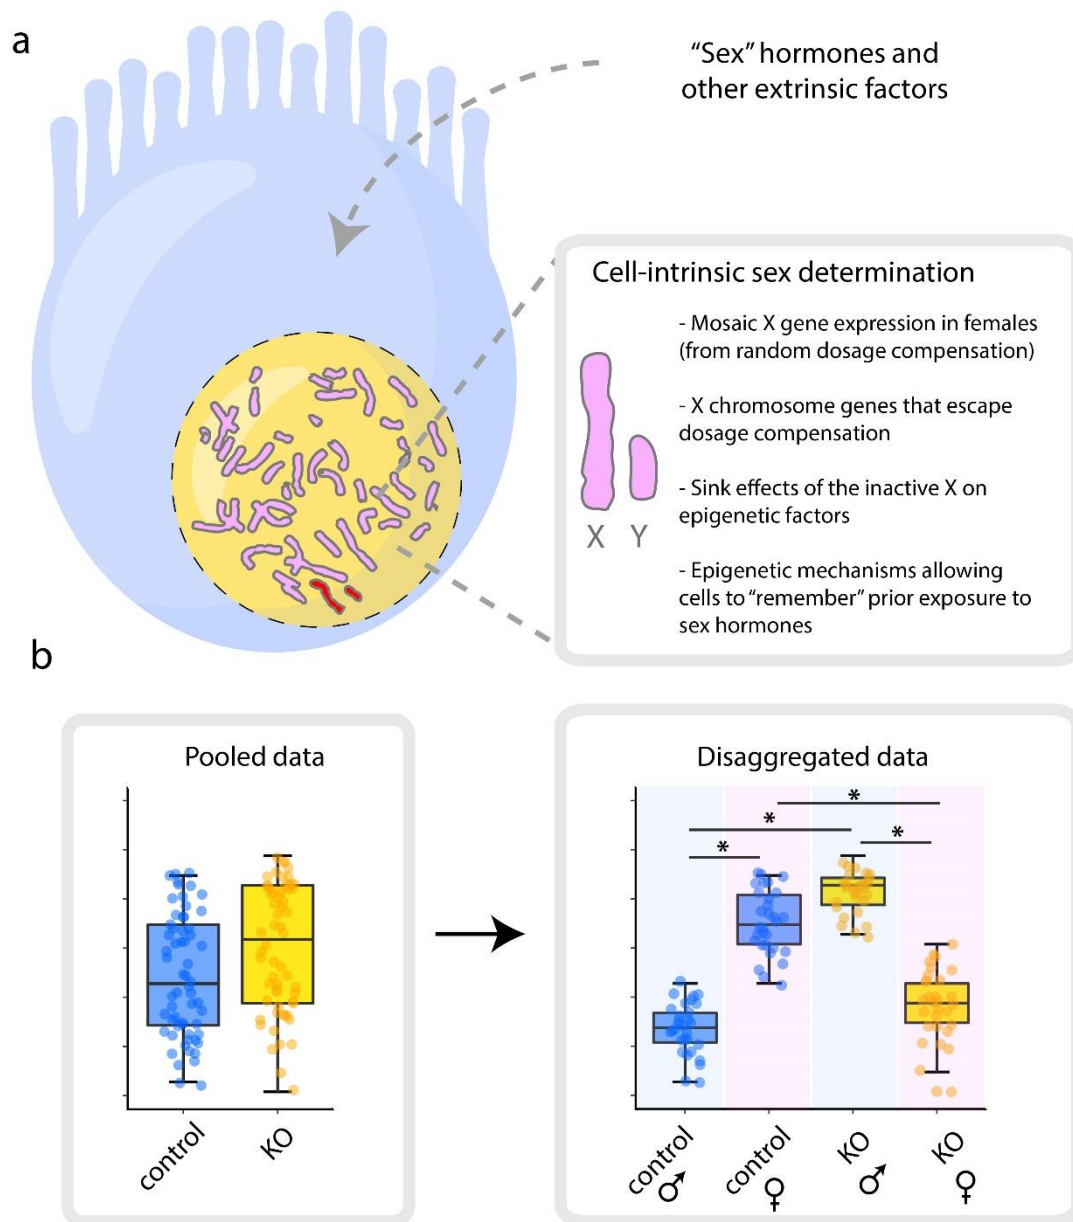

(a) Sex differences within somatic cells or organs may result from extrinsic (gonadal, hormonal) and cell-intrinsic mechanisms. (b) The "magic" of data disaggregation. You are phenotyping a knockout mouse. When mixed-sex data is pooled (left), sex differences may be masked and manifest themselves as variability in your experimental measurements (in this case, levels of a hypothetical metabolite). Inclusion of sex as a variable (right) reveals that males and females differ in their basal levels of this metabolite, and how this metabolite is impacted by genetic mutation. Hence, pooling can act as a barrier for scientific discovery.
